# Supplementary material for: Serum and Erythrocyte Antioxidant Defense in Colorectal Cancer Patients during Early Postoperative Period: Potential Modifiers and Impact on Clinical Outcomes
Source: MDPI journal article supplement (doi:10.3390/antiox10070999), 2021-06-23
Supplement: s1 [file s1]

# Supplementary material

**Table S1.** Effect of patients-, disease-, surgery-related factors on FRAP time-course and the association with adverse clinical outcomes – results of two-factor repeated measures ANOVA.

| Group                            | Group effect | Time effect | Group × time interaction effect |
|----------------------------------|--------------|-------------|---------------------------------|
| <b>Patient</b>                   |              |             |                                 |
| Sex (F/M)                        | p = 0.279    | p < 0.001   | p = 0.982                       |
| Age <sup>1</sup>                 | p = 0.012    | p < 0.001   | p = 0.116                       |
| Obesity <sup>2</sup>             | p = 0.462    | p < 0.001   | p = 0.054                       |
| Anemia <sup>3</sup>              | p = 0.332    | p < 0.001   | p = 0.528                       |
| ASA <sup>4</sup>                 | p = 0.009    | p < 0.001   | p = 0.004                       |
| <b>Disease</b>                   |              |             |                                 |
| G <sup>5</sup>                   | p = 0.787    | p = 0.004   | p = 0.147                       |
| M (n/y)                          | p = 0.197    | p = 0.008   | p = 0.776                       |
| N <sup>6</sup>                   | p = 0.288    | p < 0.001   | p = 0.390                       |
| T <sup>7</sup>                   | p = 0.735    | p < 0.001   | p = 0.530                       |
| TNM stage <sup>8</sup>           | p = 0.288    | p < 0.001   | p = 0.390                       |
| <b>Surgery</b>                   |              |             |                                 |
| type <sup>9</sup>                | p = 0.888    | p < 0.001   | p = 0.284                       |
| EBL <sup>10</sup>                | p = 0.607    | p < 0.001   | p = 0.275                       |
| Transfusions (n/y)               | p = 0.123    | p = 0.003   | p = 0.418                       |
| Length of surgery <sup>11</sup>  | p = 0.712    | p < 0.001   | p = 0.233                       |
| Excised LN <sup>12</sup>         | p = 0.280    | p < 0.001   | p = 0.636                       |
| <b>Adverse clinical outcomes</b> |              |             |                                 |
| AL (n/y)                         | p = 0.309    | p = 0.104   | p = 0.784                       |
| RoBF <sup>13</sup>               | p = 0.171    | p < 0.001   | p = 0.971                       |
| SSI (n/y)                        | p = 0.686    | p < 0.001   | p = 0.735                       |
| LoHS <sup>14</sup>               | p = 0.126    | p < 0.001   | p = 0.544                       |

<sup>1</sup> Dichotomized using ≥75 yrs. as a cut-off; <sup>2</sup> dichotomized using ≥25 kg/m<sup>2</sup> as a cut-off; <sup>3</sup> dichotomized using 120 g/L or 130 g/L cut-offs for females and males, respectively; <sup>4</sup> grouped into ASA=1/2 and ASA=3; <sup>5</sup> grouped into G=1/2 and G=3/4; <sup>6</sup> grouped into N0 and N1/2; <sup>7</sup> grouped into tis/T1/T2 and T3/4; <sup>8</sup> grouped into stage 0/I/II and III/IV; <sup>9</sup> open and robotic; <sup>10</sup> dichotomized using ≥150 ml as a cut-off; <sup>11</sup> dichotomized using ≥175 minutes as a cut-off; <sup>12</sup> dichotomized using ≥15 as a cut-off; <sup>13</sup> dichotomized using ≥5 days as a cut-off; <sup>14</sup> dichotomized using ≥6 days as a cut-off. F, females; M, males; ASA, the American Society of Anesthesiologists physical status classification system; G, histological grade; n/y, no/yes; M, distant metastasis; N, lymph node metastasis; T, depth of tumor invasion; EBL, estimated blood loss; LN, lymph nodes; AL, anastomotic leak; RoBF, restoration of bowel function; SSI, surgical site infections; LoHS, length of hospital stay.

**Table S2.** Effect of patients-, disease-, surgery-related factors on TAC time-course and the association with adverse clinical outcomes – results of two-factor repeated measures ANOVA.

| Group                            | Group effect | Time effect | Group × time interaction effect |
|----------------------------------|--------------|-------------|---------------------------------|
| <b>Patient</b>                   |              |             |                                 |
| Sex (F/M)                        | p = 0.242    | p = 0.369   | p = 0.587                       |
| Age <sup>1</sup>                 | p = 0.884    | p = 0.212   | p = 0.262                       |
| Obesity <sup>2</sup>             | p = 0.265    | p = 0.673   | p = 0.100                       |
| Anemia <sup>3</sup>              | p = 0.487    | p = 0.339   | p = 0.570                       |
| ASA <sup>4</sup>                 | p = 0.355    | p = 0.765   | p = 0.777                       |
| <b>Disease</b>                   |              |             |                                 |
| G <sup>5</sup>                   | p = 0.744    | p = 0.942   | p = 0.480                       |
| M (n/y)                          | p = 0.710    | p = 0.959   | p = 0.869                       |
| N <sup>6</sup>                   | p = 0.548    | p = 0.399   | p = 0.824                       |
| T <sup>7</sup>                   | p = 0.456    | p = 0.852   | p = 0.821                       |
| TNM stage <sup>8</sup>           | p = 0.548    | p = 0.399   | p = 0.824                       |
| <b>Surgery</b>                   |              |             |                                 |
| type <sup>9</sup>                | p = 0.344    | p = 0.406   | p = 0.419                       |
| EBL <sup>10</sup>                | p = 0.114    | p = 0.387   | p = 0.477                       |
| Transfusions (n/y)               | p = 0.319    | p = 0.751   | p = 0.995                       |
| Length of surgery <sup>11</sup>  | p = 0.398    | p = 0.386   | p = 0.730                       |
| Excised LN <sup>12</sup>         | p = 0.030    | p = 0.450   | p = 0.555                       |
| <b>Adverse clinical outcomes</b> |              |             |                                 |
| AL (n/y)                         | p = 0.807    | p = 0.968   | p = 0.953                       |
| RoBF <sup>13</sup>               | p = 0.053    | p = 0.271   | p = 0.623                       |
| SSI (n/y)                        | p = 0.663    | p = 0.964   | p = 0.206                       |
| LoHS <sup>14</sup>               | p = 0.171    | p = 0.368   | p = 0.593                       |

<sup>1</sup> Dichotomized using ≥75 yrs. as a cut-off; <sup>2</sup> dichotomized using ≥25 kg/m<sup>2</sup> as a cut-off; <sup>3</sup> dichotomized using 120 g/L or 130 g/L cut-offs for females and males, respectively; <sup>4</sup> grouped into ASA=1/2 and ASA=3; <sup>5</sup> grouped into G=1/2 and G=3/4; <sup>6</sup> grouped into N0 and N1/2; <sup>7</sup> grouped into tis/T1/T2 and T3/4; <sup>8</sup> grouped into stage 0/I/II and III/IV; <sup>9</sup> open and robotic; <sup>10</sup> dichotomized using ≥150 ml as a cut-off; <sup>11</sup> dichotomized using ≥175 minutes as a cut-off; <sup>12</sup> dichotomized using ≥15 as a cut-off; <sup>13</sup> dichotomized using ≥5 days as a cut-off; <sup>14</sup> dichotomized using ≥6 days as a cut-off. F, females; M, males; ASA, the American Society of Anesthesiologists physical status classification system; G, histological grade; n/y, no/yes; M, distant metastasis; N, lymph node metastasis; T, depth of tumor invasion; EBL, estimated blood loss; LN, lymph nodes; AL, anastomotic leak; RoBF, restoration of bowel function; SSI, surgical site infections; LoHS, length of hospital stay.

**Table S3.** Effect of patients-, disease-, surgery-related factors on SOD time-course and the association with adverse clinical outcomes – results of two-factor repeated measures ANOVA.

| Group                            | Group effect | Time effect | Group × time interaction effect |
|----------------------------------|--------------|-------------|---------------------------------|
| <b>Patient</b>                   |              |             |                                 |
| Sex (F/M)                        | p = 0.698    | p = 0.037   | p = 0.903                       |
| Age <sup>1</sup>                 | p = 0.132    | p = 0.127   | P = 0.373                       |
| Obesity <sup>2</sup>             | p = 0.246    | p = 0.054   | p = 0.659                       |
| Anemia <sup>3</sup>              | p = 0.875    | p = 0.023   | p = 0.482                       |
| ASA <sup>4</sup>                 | p = 0.489    | p = 0.186   | p = 0.018                       |
| <b>Disease</b>                   |              |             |                                 |
| G <sup>5</sup>                   | p = 0.257    | p = 0.454   | p = 0.478                       |
| M (n/y)                          | p = 0.015    | p = 0.733   | p = 0.209                       |
| N <sup>6</sup>                   | p = 0.387    | p = 0.121   | p = 0.148                       |
| T <sup>7</sup>                   | p = 0.735    | p = 0.028   | p = 0.113                       |
| TNM stage <sup>8</sup>           | p = 0.031    | p = 0.040   | p = 0.382                       |
| <b>Surgery</b>                   |              |             |                                 |
| type <sup>9</sup>                | p = 0.655    | p = 0.038   | p = 0.438                       |
| EBL <sup>10</sup>                | p = 0.695    | p = 0.034   | p = 0.784                       |
| Transfusions (n/y)               | p = 0.128    | p = 0.165   | p = 0.480                       |
| Length of surgery <sup>11</sup>  | p = 0.884    | p = 0.037   | p = 0.609                       |
| Excised LN <sup>12</sup>         | p = 0.433    | p = 0.045   | p = 0.914                       |
| <b>Adverse clinical outcomes</b> |              |             |                                 |
| AL (n/y)                         | p = 0.865    | p = 0.059   | p = 0.049                       |
| RoBF <sup>13</sup>               | p = 0.955    | p = 0.010   | p = 0.101                       |
| SSI (n/y)                        | p = 0.244    | p = 0.463   | p = 0.694                       |
| LoHS <sup>14</sup>               | p = 0.637    | p = 0.035   | p = 0.484                       |

<sup>1</sup> Dichotomized using ≥75 yrs. as a cut-off; <sup>2</sup> dichotomized using ≥25 kg/m<sup>2</sup> as a cut-off; <sup>3</sup> dichotomized using 120 g/L or 130 g/L cut-offs for females and males, respectively; <sup>4</sup> grouped into ASA=1/2 and ASA=3; <sup>5</sup> grouped into G=1/2 and G=3/4; <sup>6</sup> grouped into N0 and N1/2; <sup>7</sup> grouped into tis/T1/T2 and T3/4; <sup>8</sup> grouped into stage 0/I/II and III/IV; <sup>9</sup> open and robotic; <sup>10</sup> dichotomized using ≥150 ml as a cut-off; <sup>11</sup> dichotomized using ≥175 minutes as a cut-off; <sup>12</sup> dichotomized using ≥15 as a cut-off; <sup>13</sup> dichotomized using ≥5 days as a cut-off; <sup>14</sup> dichotomized using ≥6 days as a cut-off. F, females; M, males; ASA, the American Society of Anesthesiologists physical status classification system; G, histological grade; n/y, no/yes; M, distant metastasis; N, lymph node metastasis; T, depth of tumor invasion; EBL, estimated blood loss; LN, lymph nodes; AL, anastomotic leak; RoBF, restoration of bowel function; SSI, surgical site infections; LoHS, length of hospital stay.

**Table S4.** Effect of patients-, disease-, surgery-related factors on GPx time-course and the association with adverse clinical outcomes – results of two-factor repeated measures ANOVA.

| Group                            | Group effect | Time effect | Group × time interaction effect |
|----------------------------------|--------------|-------------|---------------------------------|
| <b>Patient</b>                   |              |             |                                 |
| Sex (F/M)                        | p = 0.329    | p = 0.811   | p = 0.922                       |
| Age <sup>1</sup>                 | p = 0.096    | p = 0.311   | p = 0.161                       |
| Obesity <sup>2</sup>             | p = 0.470    | p = 0.749   | p = 0.586                       |
| Anemia <sup>3</sup>              | p = 0.820    | p = 0.976   | p = 0.725                       |
| ASA <sup>4</sup>                 | p = 0.224    | p = 0.112   | p = 0.014                       |
| <b>Disease</b>                   |              |             |                                 |
| G <sup>5</sup>                   | p = 0.012    | p = 0.946   | p = 0.385                       |
| M (n/y)                          | p = 0.040    | p = 0.761   | p = 0.342                       |
| N <sup>6</sup>                   | p = 0.937    | p = 0.836   | p = 0.354                       |
| T <sup>7</sup>                   | p = 0.640    | p = 0.953   | p = 0.876                       |
| TNM stage <sup>8</sup>           | p = 0.172    | p = 0.870   | p = 0.434                       |
| <b>Surgery</b>                   |              |             |                                 |
| type <sup>9</sup>                | p = 0.836    | p = 0.896   | p = 0.797                       |
| EBL <sup>10</sup>                | p = 0.452    | p = 0.863   | p = 0.661                       |
| Transfusions (n/y)               | p = 0.219    | p = 0.139   | p = 0.120                       |
| Length of surgery <sup>11</sup>  | p = 0.613    | p = 0.884   | p = 0.978                       |
| Excised LN <sup>12</sup>         | p = 0.138    | p = 0.904   | p = 0.767                       |
| <b>Adverse clinical outcomes</b> |              |             |                                 |
| AL (n/y)                         | p = 0.206    | p = 0.765   | p = 0.765                       |
| RoBF <sup>13</sup>               | p = 0.626    | p = 0.682   | p = 0.067                       |
| SSI (n/y)                        | p = 0.395    | p = 0.435   | p = 0.204                       |
| LoHS <sup>14</sup>               | p = 0.488    | p = 0.491   | p = 0.223                       |

<sup>1</sup> Dichotomized using ≥75 yrs. as a cut-off; <sup>2</sup> dichotomized using ≥25 kg/m<sup>2</sup> as a cut-off; <sup>3</sup> dichotomized using 120 g/L or 130 g/L cut-offs for females and males, respectively; <sup>4</sup> grouped into ASA=1/2 and ASA=3; <sup>5</sup> grouped into G=1/2 and G=3/4; <sup>6</sup> grouped into N0 and N1/2; <sup>7</sup> grouped into tis/T1/T2 and T3/4; <sup>8</sup> grouped into stage 0/I/II and III/IV; <sup>9</sup> open and robotic; <sup>10</sup> dichotomized using ≥150 ml as a cut-off; <sup>11</sup> dichotomized using ≥175 minutes as a cut-off; <sup>12</sup> dichotomized using ≥15 as a cut-off; <sup>13</sup> dichotomized using ≥5 days as a cut-off; <sup>14</sup> dichotomized using ≥6 days as a cut-off. F, females; M, males; ASA, the American Society of Anesthesiologists physical status classification system; G, histological grade; n/y, no/yes; M, distant metastasis; N, lymph node metastasis; T, depth of tumor invasion; EBL, estimated blood loss; LN, lymph nodes; AL, anastomotic leak; RoBF, restoration of bowel function; SSI, surgical site infections; LoHS, length of hospital stay.
